# Supplementary material
Source: Copernicus journal article supplement (doi:10.5194/amt-19-3539-2026)
Supplement: Supplementary file [file amt-19-3539-2026-supplement-title-page.pdf › amt-19-3539-2026-supplement-title-page.pdf]

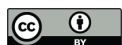

*Supplement of*

**Extraction of spatially confined small-scale waves from high-resolution all-sky airglow images based on machine learning**

**Sabine Wüst et al.**

*Correspondence to:* Sabine Wüst ([sabine.wuest@dlr.de](mailto:sabine.wuest@dlr.de))

- [amt-19-3539-2026-supplement-title-page.pdf](#)
- [FAIM04\\_202007\\_2728\\_Unvanrhijn\\_Scan.mp4](#)
- [Supplement description.docx](#)

The copyright of individual parts of the supplement might differ from the article licence.
